# Supplementary material for: Scalable synthesis of nano-sandwich N-doped carbon materials with hierarchical-structure for energy conversion and storage
Source: Royal Society of Chemistry journal article supplement (doi:10.1039/c6ra12283c), 2016-01-01
Supplement: c6ra12283c1.pdf [file c6ra12283c1.pdf]

## Supporting Information

### **Scalable Synthesis of Nano-sandwich N-doped Carbon Materials with Hierarchical-structure for energy conversion and storage**

*Kui Ding, Qin Liu, Yakun Bu, Yiyin Huang, Jiangquan Lv, Jing Wu, Syed Comail Abbas and Yaobing Wang\**

*Key Laboratory of Nanomaterials, Fujian Institute of Research on the Structure of Matter, Chinese Academy of Sciences, Fuzhou, Fujian, 350002, PR China*

E-mail: wangyb@fjirsm.ac.cn

**Table S1.** Comparison of ORR performance in literature

| <b>Source/References</b>                     | <b>Solution</b> | <b>Loading (mg cm<sup>-2</sup>)</b> | <b>Activity (V vs. Ag/AgCl)</b> |
|----------------------------------------------|-----------------|-------------------------------------|---------------------------------|
| <b>Our work (NNCM-1050-70)</b>               | PBS<br>50 mM    | 0.1                                 | $E_{\text{onset}} = 0.26$       |
| <b>N-doped carbon nanofibers<sup>1</sup></b> | PBS<br>100 mM   | 0.14                                | $E_{\text{onset}} = 0.12$       |
| <b>Activated Carbon<sup>2</sup></b>          | KCl<br>0.1 M    | 0.16                                | $E_{\text{onset}} = 0.15$       |
| <b>Activated Carbon<sup>3</sup></b>          | PBS<br>100 mM   | 0.5                                 | $E_{\text{onset}} = 0.12$       |
| <b>HP-Fe-N-Cs<sup>4</sup></b>                | PBS<br>100 mM   | 0.15                                | $E_{\text{onset}} = 0.197$      |
| <b>BP-NF<sup>5</sup></b>                     | PBS<br>50 mM    | 0.1                                 | $E_{\text{onset}} = 0.2$        |
| <b>N-Fe/Fe<sub>3</sub>C@C<sup>6</sup></b>    | PBS<br>100 mM   | 0.5                                 | $E_{\text{onset}} = 0.21$       |

**Table S2.** Comparison of supercapacitor performance in our work and some references

| Source/References                                     | Electrolyte            | Current density       | Capacitance(F g <sup>-1</sup> ) |
|-------------------------------------------------------|------------------------|-----------------------|---------------------------------|
| <b>Our work (NNCM-900-70)</b>                         | 6 M KOH                | 1 A g <sup>-1</sup>   | 178                             |
|                                                       |                        | 8 A g <sup>-1</sup>   | 121                             |
| <b>RGO</b> <sup>7</sup>                               | 6 M KOH                | 1 A g <sup>-1</sup>   | 190                             |
| <b>Graphene</b> <sup>8</sup>                          | 5 M KOH                | 0.1 A g <sup>-1</sup> | 155                             |
| <b>r[GO-CNT]</b> <sup>9</sup>                         | 1 M TEABF <sub>4</sub> | 1 A g <sup>-1</sup>   | 109.1                           |
| <b>Graphene</b> <sup>10</sup>                         | 0.5 M NaCl             | 0.6 A g <sup>-1</sup> | 230                             |
| <b>N-doped carbon fibers</b> <sup>11</sup>            | 6 M KOH                | 1 A g <sup>-1</sup>   | 202                             |
| <b>Co<sub>3</sub>O<sub>4</sub>/r-GO</b> <sup>12</sup> | 6 M KOH                | 1 A g <sup>-1</sup>   | 163.8                           |

## Performance of gas storage

Considering the tunable pore size, heteroatom doping and high specific surface area in NNCMs, especially the NNCMs-1050-70, and the energy gas molecules, such as the hydrogen and acetylene, uptake were measured. Hydrogen adsorption isotherms of those carbon materials from 0-1 atm at 77 K by the volumetric method are shown in Figure S1. The hydrogen uptakes of NNCM-1050-70 were 1.74 wt% at 1 atm, which is comparable with best activated carbon (about 1.8 %) as reported previously.<sup>13</sup> This excellent performance may be resulted from the synergetic effect of the high specific surface area, suitable pore size and the N-doping in the carbon nanomaterials. In practice, C<sub>2</sub>H<sub>2</sub> gas is stored at ambient temperatures. The C<sub>2</sub>H<sub>2</sub> adsorption experiment was carried out at room temperature (295 K) under 1 atm. The C<sub>2</sub>H<sub>2</sub> adsorption amount for NNCM-1050-70 reaches up to 75 cm<sup>3</sup>(STP) g<sup>-1</sup> at 295 K and 1 atm, near to the highest record of pores space adsorption 113 cm<sup>3</sup> (STP) g<sup>-1</sup>.<sup>14</sup> The tunable pore size, heteroatom doping and high specific surface area of the NNCMs may be responsible for C<sub>2</sub>H<sub>2</sub> storage. In conclusion, the obtained NNCMs with hierarchical structure can be used as a potential candidate for the renewable energy gas storage.

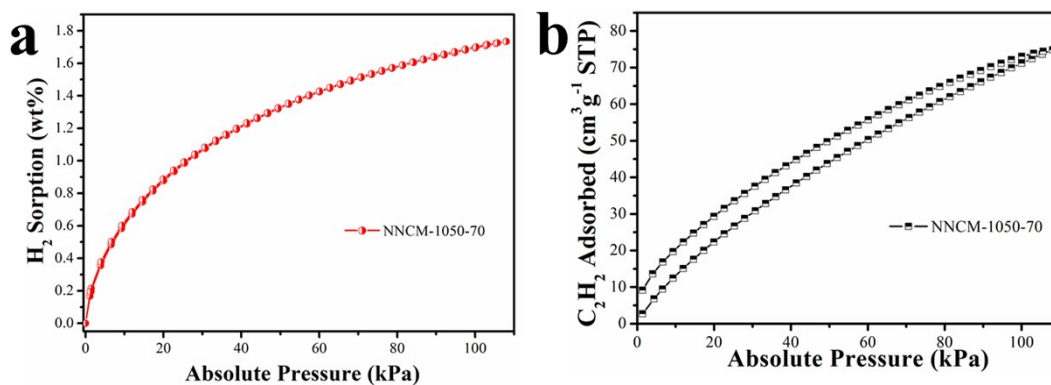

**Figure S1.** (a) Hydrogen adsorption isotherms of NNCM-1050-70 from 0 to 1 atm at 77 K by the volumetric method. (b) C<sub>2</sub>H<sub>2</sub> adsorption of NNCM-1050-70 from 0 to 1 atm at 295 K.

### Reference for supporting information:

1. X. Yang, W. Zou, Y. Su, Y. Zhu, H. Jiang, J. Shen, and C. Li, *J. Power Sources*, 2014, 266, 36-42.
2. H. Dong, H. Yu and X. Wang, *Environ. Sci. Technol.*, 2012, 46, 13009-13015.
3. V. J. Watson, C. N. Delgado, B. E. Logan, *J. Power Sources*, 2013, 242, 756-761.
4. Y. Su, H. Jiang, Y. Zhu, W. Zou, X. Yang, J. Chen, and C. Li, *J. Power Sources*, 2014, 265, 246-253.
5. K. Meng, Q. Liu, Y. Huang and Y. Wang, *J. Mater. Chem. A*, 2015, 3, 6873-6877.
6. Z. Wen, S. Ci, F. Zhang, X. Feng, S. Cui, S. Mao, S. Luo, Z. He and J. Chen, *Adv. Mater.*, 2012, 24, 1399-1404.
7. Z. Lei, L. Lu and X. S. Zhao, *Energy Environ. Sci.*, 2012, 5, 6391-6399.
8. L. Jiayan, J. Hee Dong and H. Jiaying, *ACS Nano*, 2013, 7, 1464-1471.
9. N. Jung, S. Kwon, D. Lee, D. M. Yoon, Y. M. Park, A. Benayad, J. Y. Choi and J. S. Park, *Adv. Mater.*, 2013, 25, 6854-6858.
10. H. Wang, D. Zhang, T. Yan, X. Wen, L. Shi and J. Zhang, *J. Mater. Chem.*, 2012, 22, 23745-23748.
11. L. Chen, X. Zhang, H. Liang, M. Kong, Q. Guan, P. Chen, Z. Wu, and S. Yu, *ACS Nano*, 2012, 6, 7092-7102.
12. W. Zhou, J. Liu, T. Chen, K. S. Tan, X. Jia, Z. Luo, C. Cong, H. Yang, C. M. Li and T. Yu, *Phys. Chem. Chem. Phys.*, 2011, 13, 14462-14465.
13. H. Wang, Q. Gao and J. Hu, *J. Am. Chem. Soc.*, 2009, **131**, 7016-7022.
14. J. Pang, F. Jiang, M. Wu, C. Liu, K. Su, W. Lu, D. Yuan and M. Hong, *Nat. Commun.*, 2015, 6, 7575.
